# Supplementary material
Source: MDPI journal article supplement (https://www.mdpi.com/2073-4441/12/9/2490)
Supplement: s1 [file s1]

# Ready for Drought?

## Participant survey

---

Your participation in this survey will help the "Ready for Drought" game creators understand the effectiveness of the game as an educational and awareness building tool. With your input, we will tailor the "Ready for Drought" game to better future participants' experience. Your response is confidential and voluntary. Your feedback is important to us. Thank you!

---

What is your primary affiliation?

- University
  - Federal Agency
  - State Agency
  - Tribal Agency or Government
  - Local Government/Agency
  - Individual/Private Citizen
  - Non-profit/NGO/Community Group
  - Business/Industry
  - Media
  - Other (please describe) \_\_\_\_\_
-

**With which sector(s) do you identify with? Check all that apply.**

- Water resources (including municipal water systems)
  - Emergency management
  - Agriculture
  - Forestry, fire management
  - Fish & wildlife
  - Recreation, tourism
  - Public health
  - Electricity/energy production
  - Local industries that use water
  - Navigation
  - Other (please describe) \_\_\_\_\_
- 

Generally, how would you describe your familiarity with drought planning or management?

- Not at all familiar
  - Slightly familiar
  - Moderately familiar
  - Extremely familiar
-

Please indicate the degree to which you agree or disagree with the following statements about your experience with the "Ready for Drought" game:

|                                                                                                                                 | Completely disagree   | Somewhat disagree     | Neutral               | Somewhat agree        | Completely agree      |
|---------------------------------------------------------------------------------------------------------------------------------|-----------------------|-----------------------|-----------------------|-----------------------|-----------------------|
| I am more familiar now with the process of planning for droughts than I was before participating in the game.                   | <input type="radio"/> |
| I am more likely now to use climate information to help me make decisions and plan than I was before participating in the game. | <input type="radio"/> |
| The drought scenario challenges provided a realistic context for decision making.                                               | <input type="radio"/> |
| The length of the game was appropriate.                                                                                         | <input type="radio"/> |
| The pace of the game was appropriate.                                                                                           | <input type="radio"/> |
| I learned information during this game that will inform my future decisions related to drought management.                      | <input type="radio"/> |
| The relevant stakeholders and interests were represented in the game. (If disagree, who should be included?)                    | <input type="radio"/> |
| The game is an effective team builder or icebreaker activity.                                                                   | <input type="radio"/> |
| The game is an effective tool to build awareness about drought.                                                                 | <input type="radio"/> |
| The game is an effective tool to build awareness about the need for communication and cooperation in managing drought.          | <input type="radio"/> |
| I think the game should be played at more functions like this one.                                                              | <input type="radio"/> |

What additional information do you wish you had during game play?

---

---

---

---

---

---

What did you like or dislike about the "Ready for Drought" game?

---

---

---

---

---

---

What recommendations do you have to improve the game?

---

---

---

---

---

As a result of the game, did you:

|                                                                                                                     | No                    | Yes                   | Not applicable        |
|---------------------------------------------------------------------------------------------------------------------|-----------------------|-----------------------|-----------------------|
| Meet a person you didn't know before who could be a beneficial contact in the future?                               | <input type="radio"/> | <input type="radio"/> | <input type="radio"/> |
| Discuss potential projects or collaborations?                                                                       | <input type="radio"/> | <input type="radio"/> | <input type="radio"/> |
| Learn about another person's interests with regard to drought mitigation that will be useful to you professionally? | <input type="radio"/> | <input type="radio"/> | <input type="radio"/> |
| Identify potential opportunities to coordinate efforts?                                                             | <input type="radio"/> | <input type="radio"/> | <input type="radio"/> |

As a result of the game, how likely are you to:

|                                                                                                       | Not likely            | Somewhat likely       | Very Likely           | Not applicable        | I don't know          |
|-------------------------------------------------------------------------------------------------------|-----------------------|-----------------------|-----------------------|-----------------------|-----------------------|
| Pursue new projects or collaborations with someone you have worked with before?                       | <input type="radio"/> |
| Pursue new projects or collaborations with someone you have NOT worked with before?                   | <input type="radio"/> |
| Follow up to learn more about another aspect of drought mitigation?                                   | <input type="radio"/> |
| Consider a different approach to problem solving, decision making and/or planning related to drought? | <input type="radio"/> |

Based on your experience, for what purposes would you recommend the use of the "Ready for Drought" game?

|                                                              | No                    | Maybe                 | Yes                   |
|--------------------------------------------------------------|-----------------------|-----------------------|-----------------------|
| Networking among stakeholders                                | <input type="radio"/> | <input type="radio"/> | <input type="radio"/> |
| Increasing levels of trust among stakeholders                | <input type="radio"/> | <input type="radio"/> | <input type="radio"/> |
| Learning about drought impacts                               | <input type="radio"/> | <input type="radio"/> | <input type="radio"/> |
| Improving communication among stakeholders                   | <input type="radio"/> | <input type="radio"/> | <input type="radio"/> |
| Creating new collaborations to address common problems       | <input type="radio"/> | <input type="radio"/> | <input type="radio"/> |
| Identifying strategies for solving drought-related problems  | <input type="radio"/> | <input type="radio"/> | <input type="radio"/> |
| Learning about drought resilience                            | <input type="radio"/> | <input type="radio"/> | <input type="radio"/> |
| Identifying needs for additional training                    | <input type="radio"/> | <input type="radio"/> | <input type="radio"/> |
| Assessing causes of drought vulnerability                    | <input type="radio"/> | <input type="radio"/> | <input type="radio"/> |
| Demonstrating the importance of communication and coalitions | <input type="radio"/> | <input type="radio"/> | <input type="radio"/> |
| What other purposes would you add?                           |                       |                       |                       |
